# Supplementary material
Source: publisher site journal article supplement (https://www.dovepress.com/article/293426)
Supplement: Supplementary file 1 [file get_supplementary_file.php]

| **Supplementary Table S1. Sleep problems in children with ASD** | | |
| --- | --- | --- |
| **Questions and options (Multiple choices)** | ***N*** | ***%*** |
| **Does the child have the following sleep problems? (n=406)** |  |  |
| None | 202 | 49.7 |
| Difficulty in falling asleep | 119 | 29.3 |
| Difficulty waking up | 18 | 4.4 |
| Waking at night | 58 | 14.3 |
| Nightmares | 3 | 0.7 |
| Night terrors | 16 | 3.9 |
| Sleepwalking | 0 | 0 |
| Sleep rhythm disturbance | 34 | 8.4 |
| Grind teeth in sleep | 24 | 5.9 |
| Difficulty falling asleep again after waking | 67 | 16.5 |
| **What is the performance of children's sleep quality deterioration? (n=39)** |  |  |
| Extended fall-asleep-time | 20 | 51.3 |
| Difficulty waking up | 3 | 7.7 |
| Waking at night | 12 | 30.8 |
| Nightmares increase | 1 | 2.6 |
| Night terrors increase | 2 | 5.1 |
| Sleepwalking increase | 0 | 0.0 |
| Sleep rhythm disturbance | 8 | 20.5 |
| Grinding teeth in sleep increase | 2 | 5.1 |
| Difficulty falling asleep again after waking | 14 | 35.9 |
| Broken sleep | 17 | 43.6 |
